# Supplementary material for: Palladium nanoparticles modified electrospun CoFe2O4 nanotubes with enhanced peroxidase-like activity for colorimetric detection of hydrogen peroxide
Source: Royal Society of Chemistry journal article supplement (doi:10.1039/c6ra01527a), 2016-01-01
Supplement: c6ra01527a1.pdf [file c6ra01527a1.pdf]

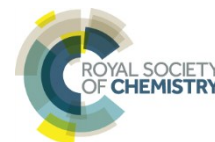

PAPER

**Electronic Supplementary Information (ESI) for**

Received 00th January 20xx,  
Accepted 00th January 20xx

DOI: 10.1039/x0xx00000x

[www.rsc.org/](http://www.rsc.org/)

**Palladium nanoparticles modified electrospun CoFe<sub>2</sub>O<sub>4</sub> nanotubes with enhanced peroxidase-like activity for colorimetric detection of hydrogen peroxide**

**Ze Zhou Yang, Zhen Zhang, Yanzhou Jiang, Maoqiang Chi, Guangdi Nie, Xiaofeng Lu\*, Ce Wang**

Alan G. MacDiarmid Institute, College of Chemistry, Jilin University, Changchun, 130012, P. P. China

**Corresponding Author:** xflu@jlu.edu.cn

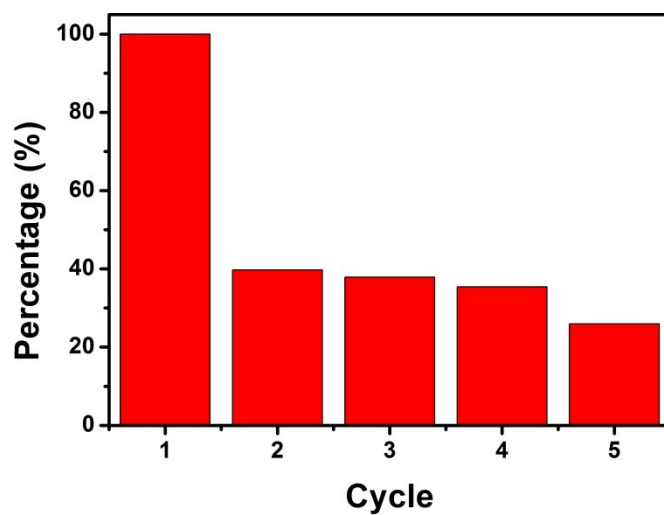

Fig. S1 The percentage values of relative catalytic activity of five cyclic experiments.

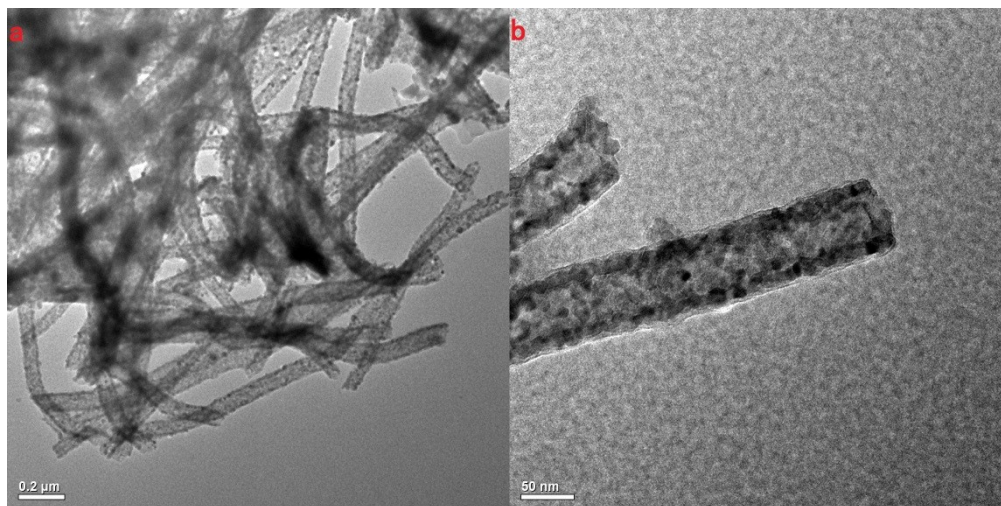

Fig. S2 (a, b) HRTEM images of Pd/CoFe<sub>2</sub>O<sub>4</sub> composite nanotubes after five cyclic experiments with a low and high magnification.
